Correction

# Correction: Secondary Household Transmission of 2009 Pandemic Influenza A (H1N1) Virus among an Urban and Rural Population in Kenya, 2009–2010

The PLOS ONE Staff

In Table 4, the second row in the column titled "Lwak" should be 22.5% (11/49), instead of 4.3% (21/486). Additionally, the third row of the column titled "Kibera" should be 4.3% (21/486), instead of 22.5% (11/49). Please see the correct Table 4 here:

**Table 4. Percentage (number) of Secondary Influenza-Like Illness Among Household Contacts of Confirmed pH1N1 patients, by Household Contact Age and by Patient Age - Kibera and Lwak, Kenya, 2009–2010.**

| Age                                  | Location      |                |
|--------------------------------------|---------------|----------------|
|                                      | Kibera        | Lwak           |
| Household contact                    |               |                |
| <5                                   | 6.1% (6/98)   | 22.5% (11/49)  |
| ≥5                                   | 4.3% (21/486) | 5.9% (18/303)  |
| Relative Risk (95% CI <sup>a</sup> ) | 1.4 (0.6–3.4) | 3.8 (1.9–7.5)  |
| Patient                              |               |                |
| <5                                   | 5.0% (11/219) | 3.2% (2/62)    |
| 5–15                                 | 3.3% (8/245)  | 11.2% (23/206) |
| ≥15                                  | 6.7% (8/120)  | 4.8% (4/84)    |
| P-value <sup>b</sup>                 | .33           | .06            |

<sup>a</sup>CI = confidence interval.

<sup>b</sup>We calculated the p-values using chi-square tests.

doi:10.1371/journal.pone.0038166.t004

## Reference

- Kim CY, Breiman RF, Cosmas L, Audi A, Aura B, et al. (2012) Secondary Household Transmission of 2009 Pandemic Influenza A (H1N1) Virus among an Urban and Rural Population in Kenya, 2009–2010. PLoS ONE 7(6): e38166. doi:10.1371/journal.pone.0038166

**Citation:** The PLOS ONE Staff (2014) Correction: Secondary Household Transmission of 2009 Pandemic Influenza A (H1N1) Virus among an Urban and Rural Population in Kenya, 2009–2010. PLoS ONE 9(3): e91443. doi:10.1371/journal.pone.0091443

**Published:** March 26, 2014

**Copyright:** © 2014 The PLOS ONE Staff. This is an open-access article distributed under the terms of the Creative Commons Attribution License, which permits unrestricted use, distribution, and reproduction in any medium, provided the original author and source are credited.
